# Supplementary material
Source: PubMed Central journal article supplement (PMC2706453)

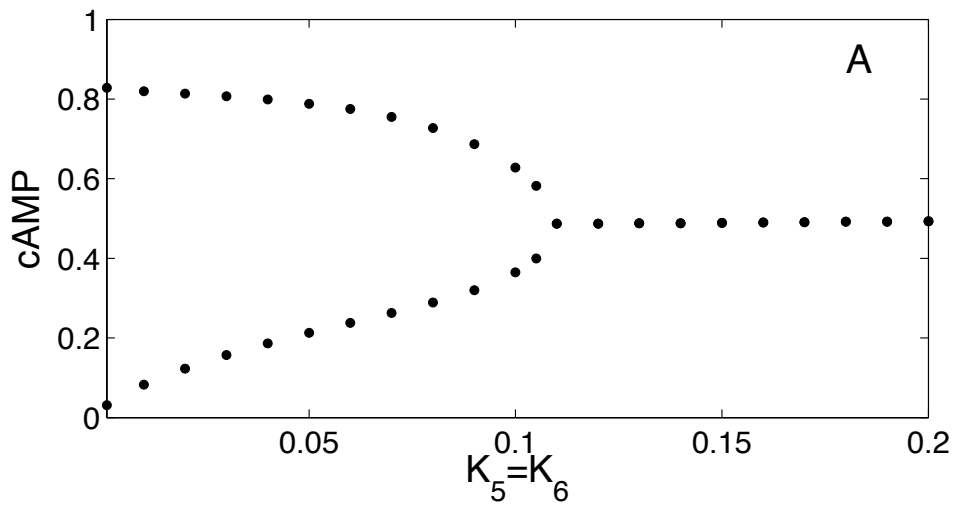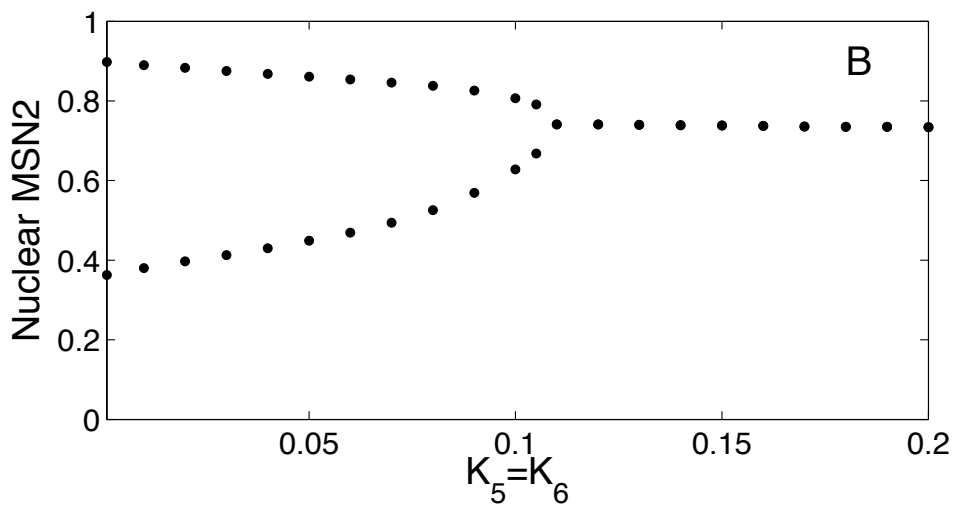

Figure S1

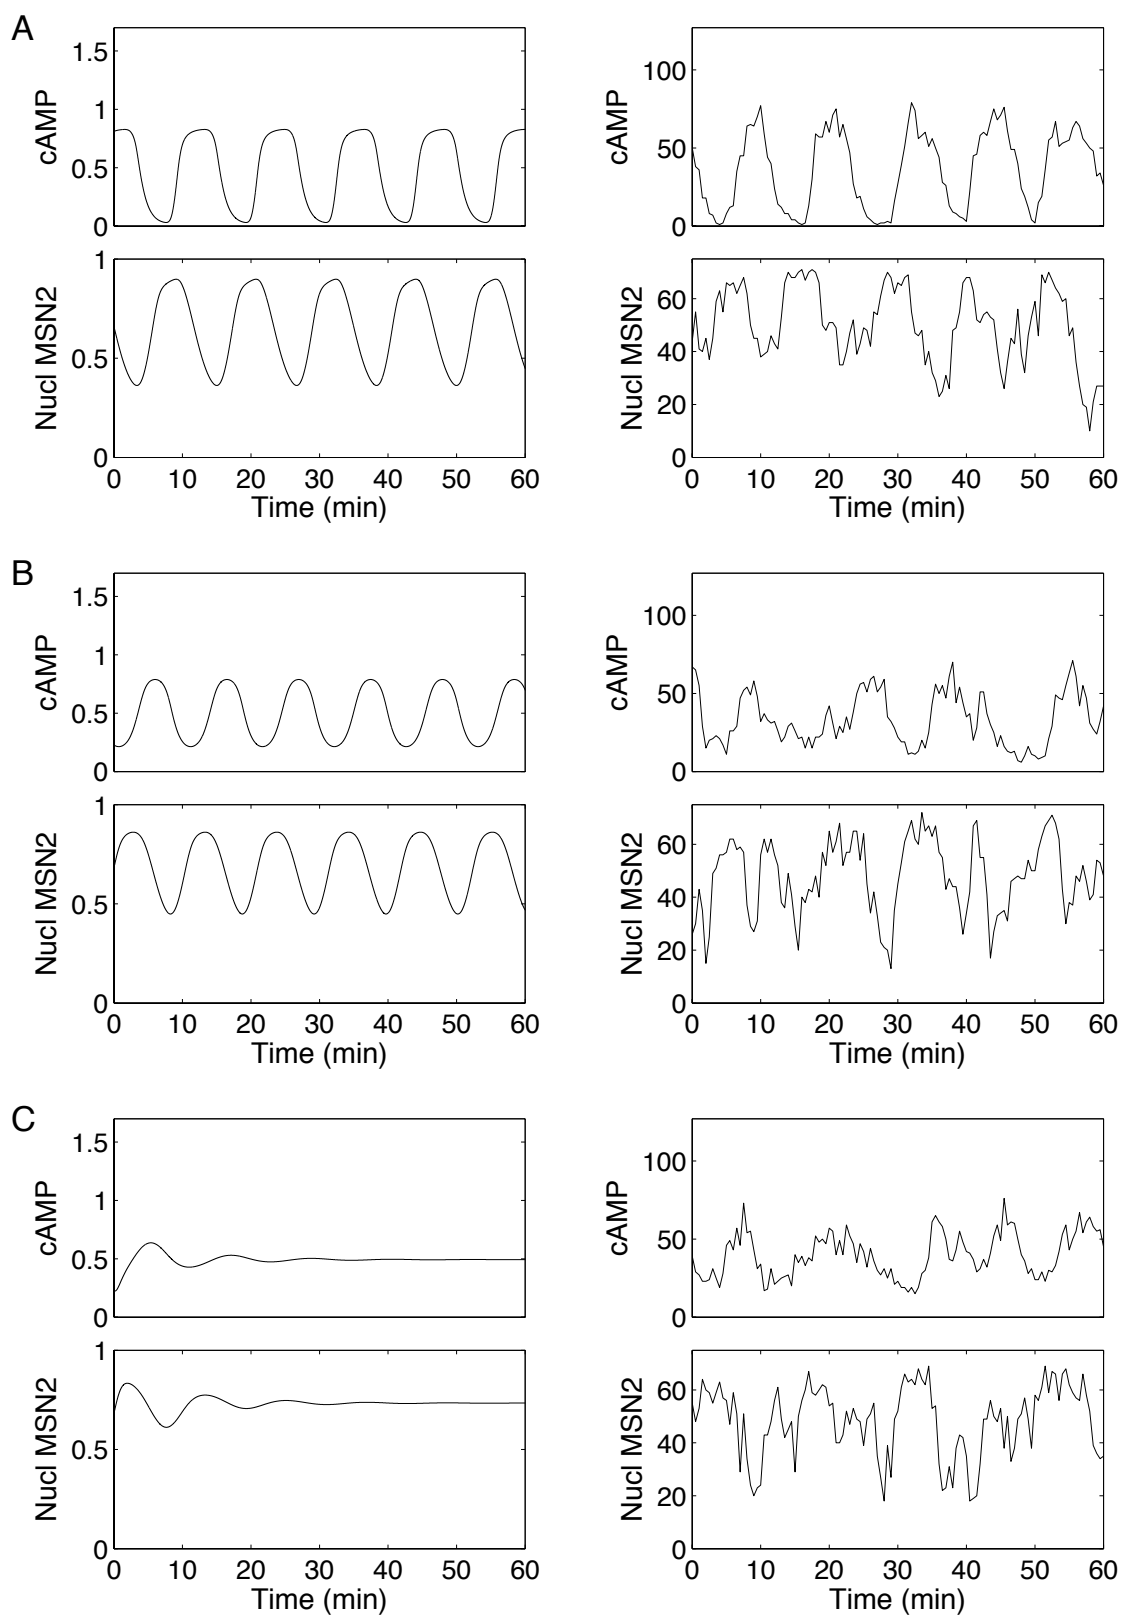

Figure S2

Supplement: rsif20080141s05.pdf [file rsif20080141s05.pdf]
